# Supplementary material
Source: HighWire-hosted journal article supplement (https://erj.ersjournals.com/content/54/6/1902111)
Supplement: inline-supplementary-material-1 [file inline-supplementary-material-1.pdf]

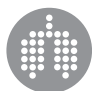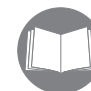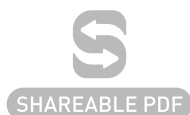

# Macrolide combination therapy for hospitalised CAP patients? An individualised approach supported by machine learning

Carolina Garcia-Vidal<sup>1</sup>, Catia Cillóniz <sup>2</sup> and Antoni Torres<sup>2</sup>

**Affiliations:** <sup>1</sup>Dept of Infectious Diseases, Hospital Clinic of Barcelona, Barcelona, Spain. <sup>2</sup>Dept of Pneumology, Hospital Clinic of Barcelona; August Pi i Sunyer Biomedical Research Institute - IDIBAPS, University of Barcelona, Biomedical Research Networking Centers in Respiratory Diseases (CIBERES) Barcelona, Barcelona, Spain.

**Correspondence:** Antoni Torres, Dept of Pneumology, Hospital Clinic of Barcelona, C/Villarroel 170, 08036 Barcelona, Spain. E-mail: atorres@clinic.cat

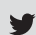

@ERSpublications

The article by König and co-workers paves the way for the selection of a subset of patients with CAP in whom combination initial therapy including macrolides could improve outcomes using a new and interesting mathematical approach <http://bit.ly/2p8RdCD>

**Cite this article as:** Garcia-Vidal C, Cillóniz C, Torres A. Macrolide combination therapy for hospitalised CAP patients? An individualised approach supported by machine learning. *Eur Respir J* 2019; 54: 1902111 [<https://doi.org/10.1183/13993003.02111-2019>].

This single-page version can be shared freely online.

The use of macrolides in combination with betalactams to improve outcomes in patients with community-acquired pneumonia (CAP) remains a topic of controversy, mainly because most of the evidence comes from observational studies rather than from randomised clinical trials (RCTs). Some recent studies have suggested that macrolides are effective in patients with *Streptococcus pneumoniae* infection plus a high systemic inflammatory response [1]. However, macrolides can be harmful [2] and there is a clear need to identify CAP phenotypes that would benefit from macrolides without suffering negative effects. We are unlikely to solve this question using conventional study designs; rather, we need to explore new technologies, among them the use of models obtained with machine learning methodology.
